# Supplementary material for: The Radical Scavenging Activities and Anti-Wrinkle Effects of Soymilk Fractions Fermented with Lacticaseibacillus paracasei MK1 and Their Derived Peptides
Source: MDPI journal article supplement (doi:10.3390/antiox12071392), 2023-07-06
Supplement: s1 [file s1]

**Table S1.** Instrument and operating condition of HPLC for the analysis of free amino acids

| Condition                                    |                                           |      |     |     |
|----------------------------------------------|-------------------------------------------|------|-----|-----|
| System                                       | Waters 510 HPLC pump                      |      |     |     |
|                                              | Waters Gradient controller                |      |     |     |
|                                              | Waters 717 automatic sampler              |      |     |     |
| Column                                       | Waters pico-tag column (3.9×300 mm, 4 μm) |      |     |     |
| Detector                                     | Waters 2487 UV detector, 254 nm           |      |     |     |
| Data analysis                                | Empower 2 software                        |      |     |     |
| Gradient condition                           | Time(min)                                 | Flow | %A* | %B  |
|                                              | Initial                                   | 1.0  | 100 | 0   |
|                                              | 9.0                                       | 1.0  | 86  | 14  |
|                                              | 9.2                                       | 1.0  | 80  | 20  |
|                                              | 17.5                                      | 1.0  | 54  | 46  |
|                                              | 17.7                                      | 1.0  | 0   | 100 |
|                                              | 21.0                                      | 1.0  | 100 | 0   |
|                                              | 24.0                                      | 1.0  | 100 | 0   |
|                                              | 25.0                                      | 1.0  | 100 | 0   |
| *%A: 140 mM sodium acetate (6% acetonitrile) |                                           |      |     |     |
| %B: 60% acetonitrile                         |                                           |      |     |     |

**Table S2.** Instrument and operating condition of LC/MS-MS for the analysis of peptide

| Condition                                             |                                                                                                                             |               |     |    |
|-------------------------------------------------------|-----------------------------------------------------------------------------------------------------------------------------|---------------|-----|----|
| System                                                | Auto switching nano pump and autosampler (Tempo nano LC system, MDC SCIEX, Canada)                                          |               |     |    |
| Column                                                | Zorbax 300SB-C18 trap column (300 $\mu$ m i.d $\times$ 5 mm, 5 $\mu$ m, 100 Å, Agilent Technologies, part number 5065-9913) |               |     |    |
|                                                       | Zorbax 300SB-C18 capillary column (75 $\mu$ m i.d $\times$ 150 mm, 3.5 $\mu$ m, 100 Å, part number 5065-9911)               |               |     |    |
|                                                       | Hybrid Quadrupole-TOF MS/MS spectrometer (QStar Elite, Applied Biosystems, USA)                                             |               |     |    |
| Detector                                              | Analyst QS 2.0 software (Applied Biosystems, USA)                                                                           |               |     |    |
| Data analysis                                         | Time (min)                                                                                                                  | Flow (nL/min) | %A* | %B |
|                                                       | Initial                                                                                                                     | 5,000         | 98  | 2  |
|                                                       | 6                                                                                                                           | 300           | 65  | 35 |
| Gradient condition                                    | 36                                                                                                                          | 300           | 10  | 90 |
|                                                       | 46                                                                                                                          | 300           | 10  | 90 |
|                                                       | 51                                                                                                                          | 300           | 95  | 5  |
|                                                       | 66                                                                                                                          | 300           | 95  | 5  |
| *%A: Water/acetonitrile (98:2, v/v), 0.1% formic acid |                                                                                                                             |               |     |    |
| %B: Water/acetonitrile (2:98, v/v), 0.1% formic acid  |                                                                                                                             |               |     |    |

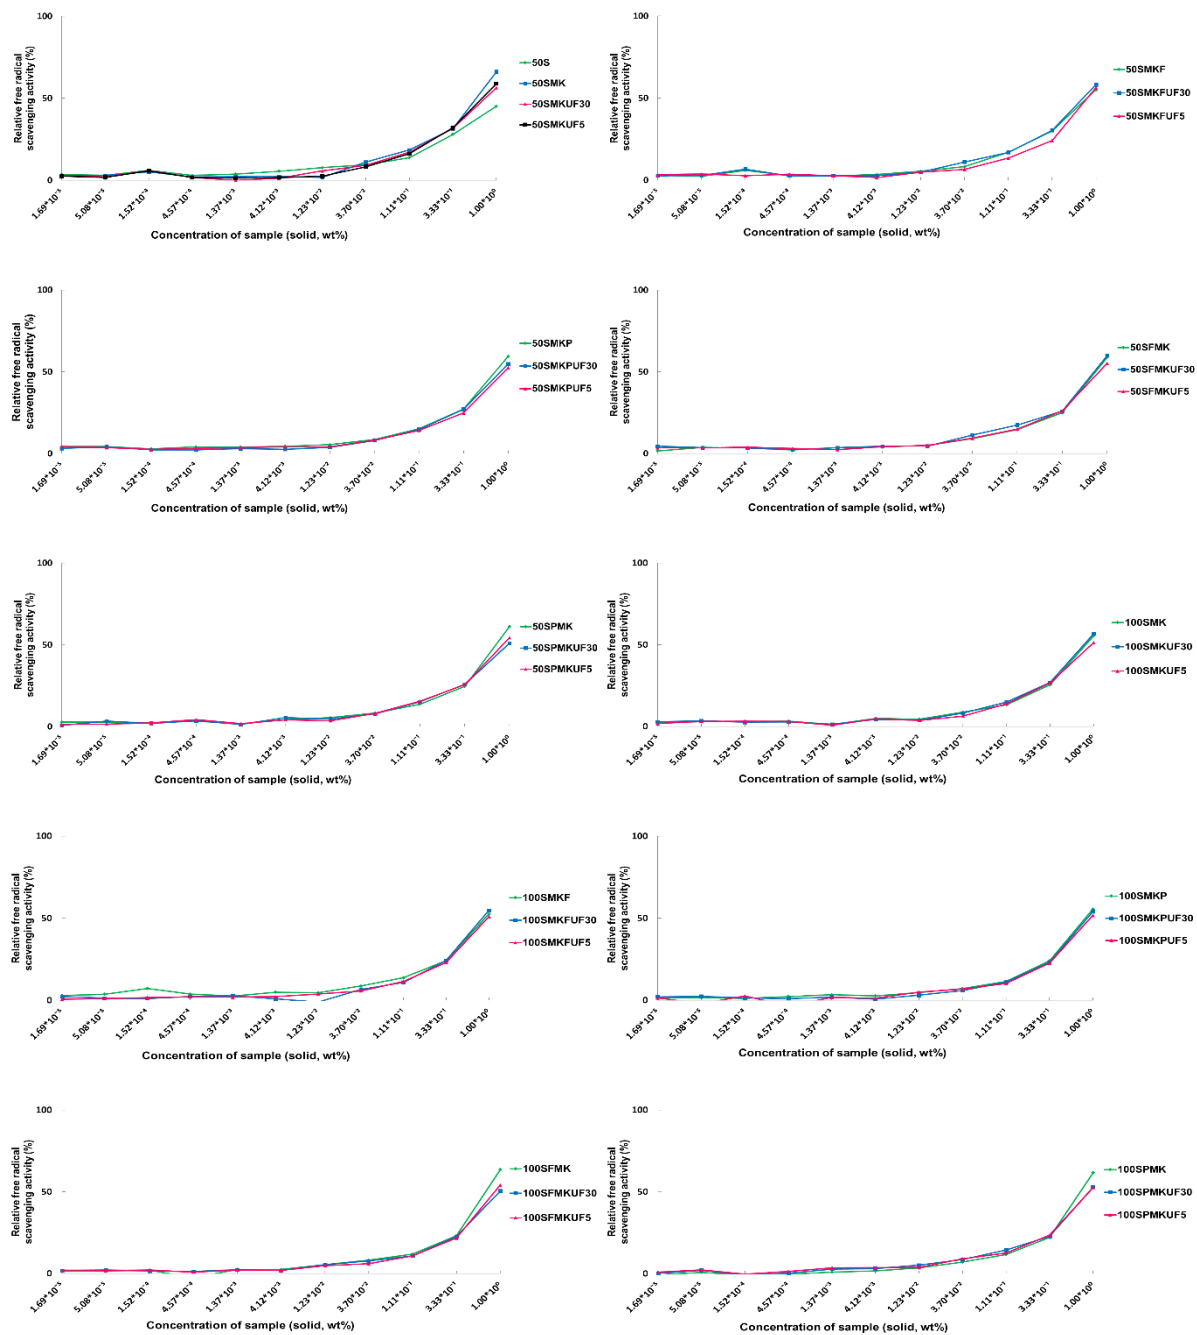

Figure S1. DPPH radical scavenging activity of soymilk fractions.

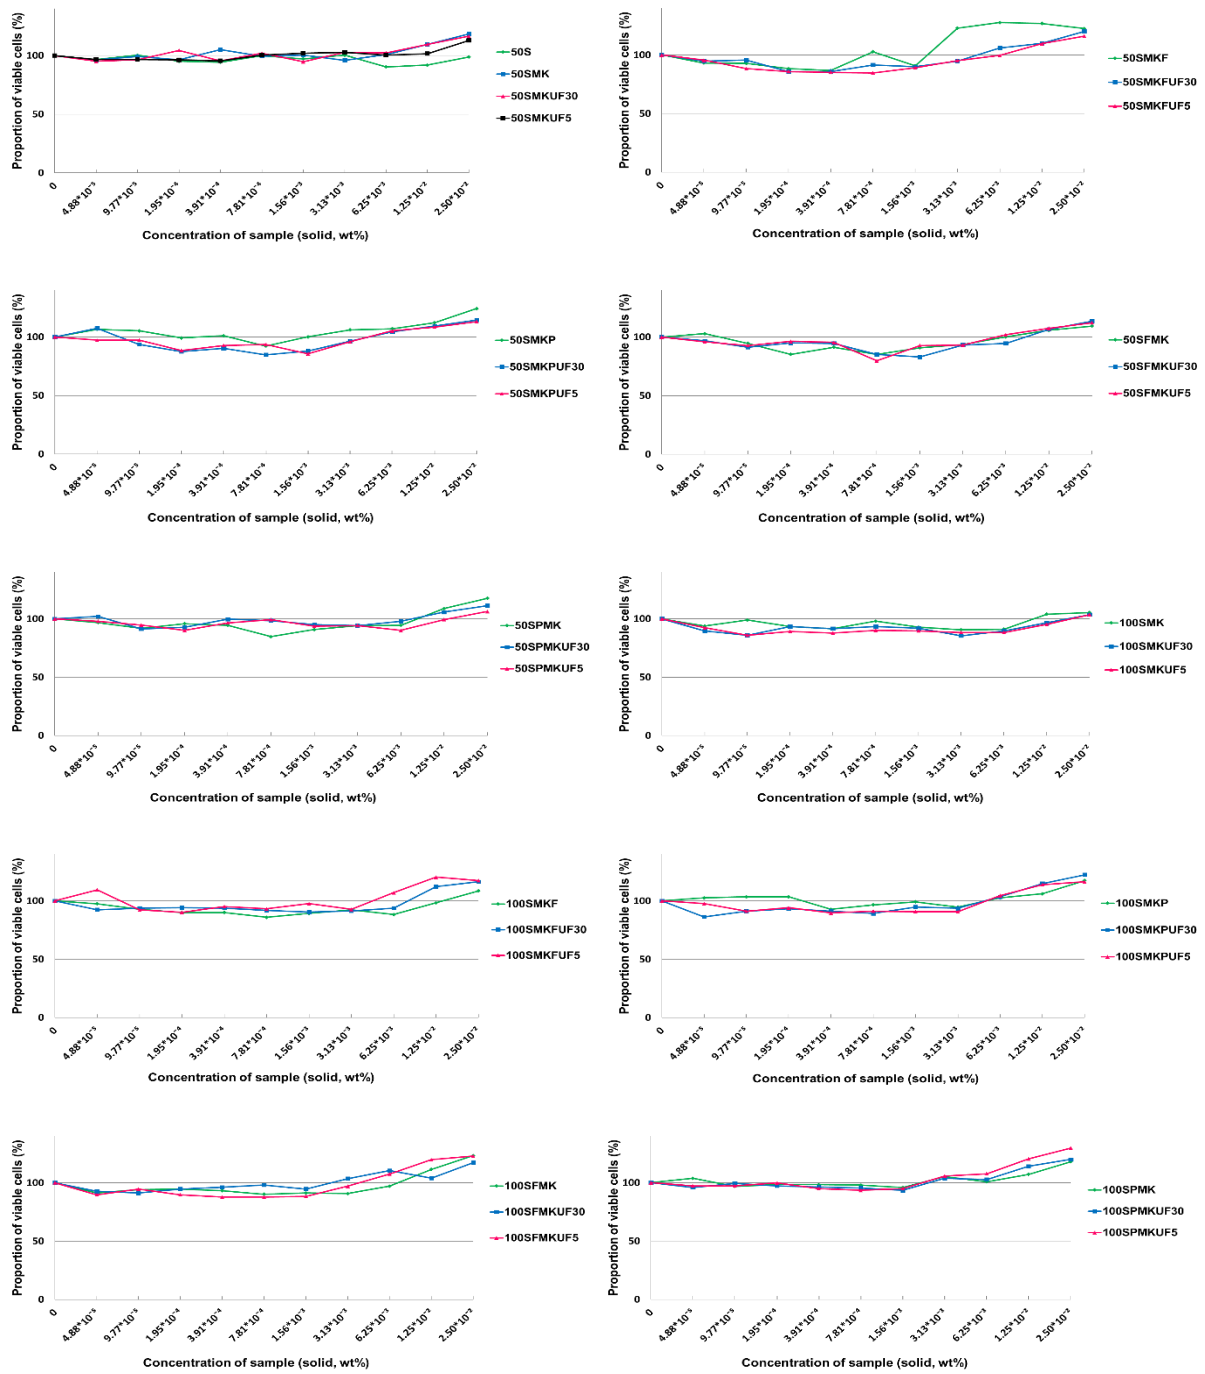

**Figure S2.** Effect of soymilk fractions on the viability of human dermal fibroblasts.

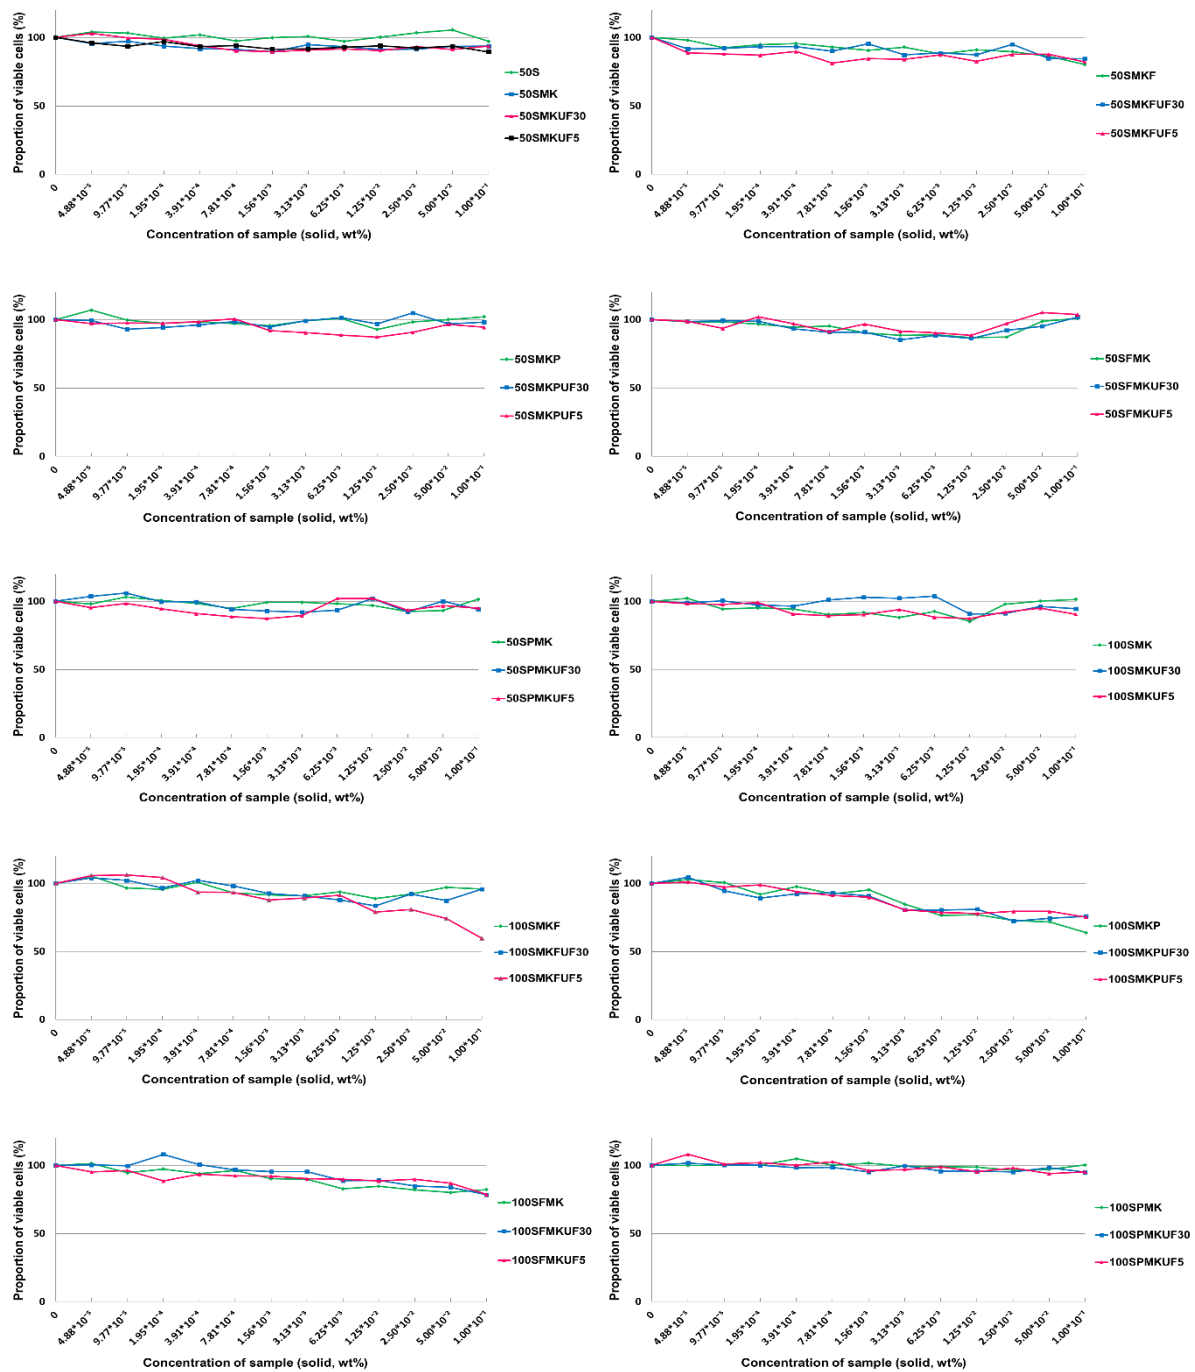

**Figure S3.** Effect of soymilk fractions on the cytotoxicity of HaCaT keratinocytes.

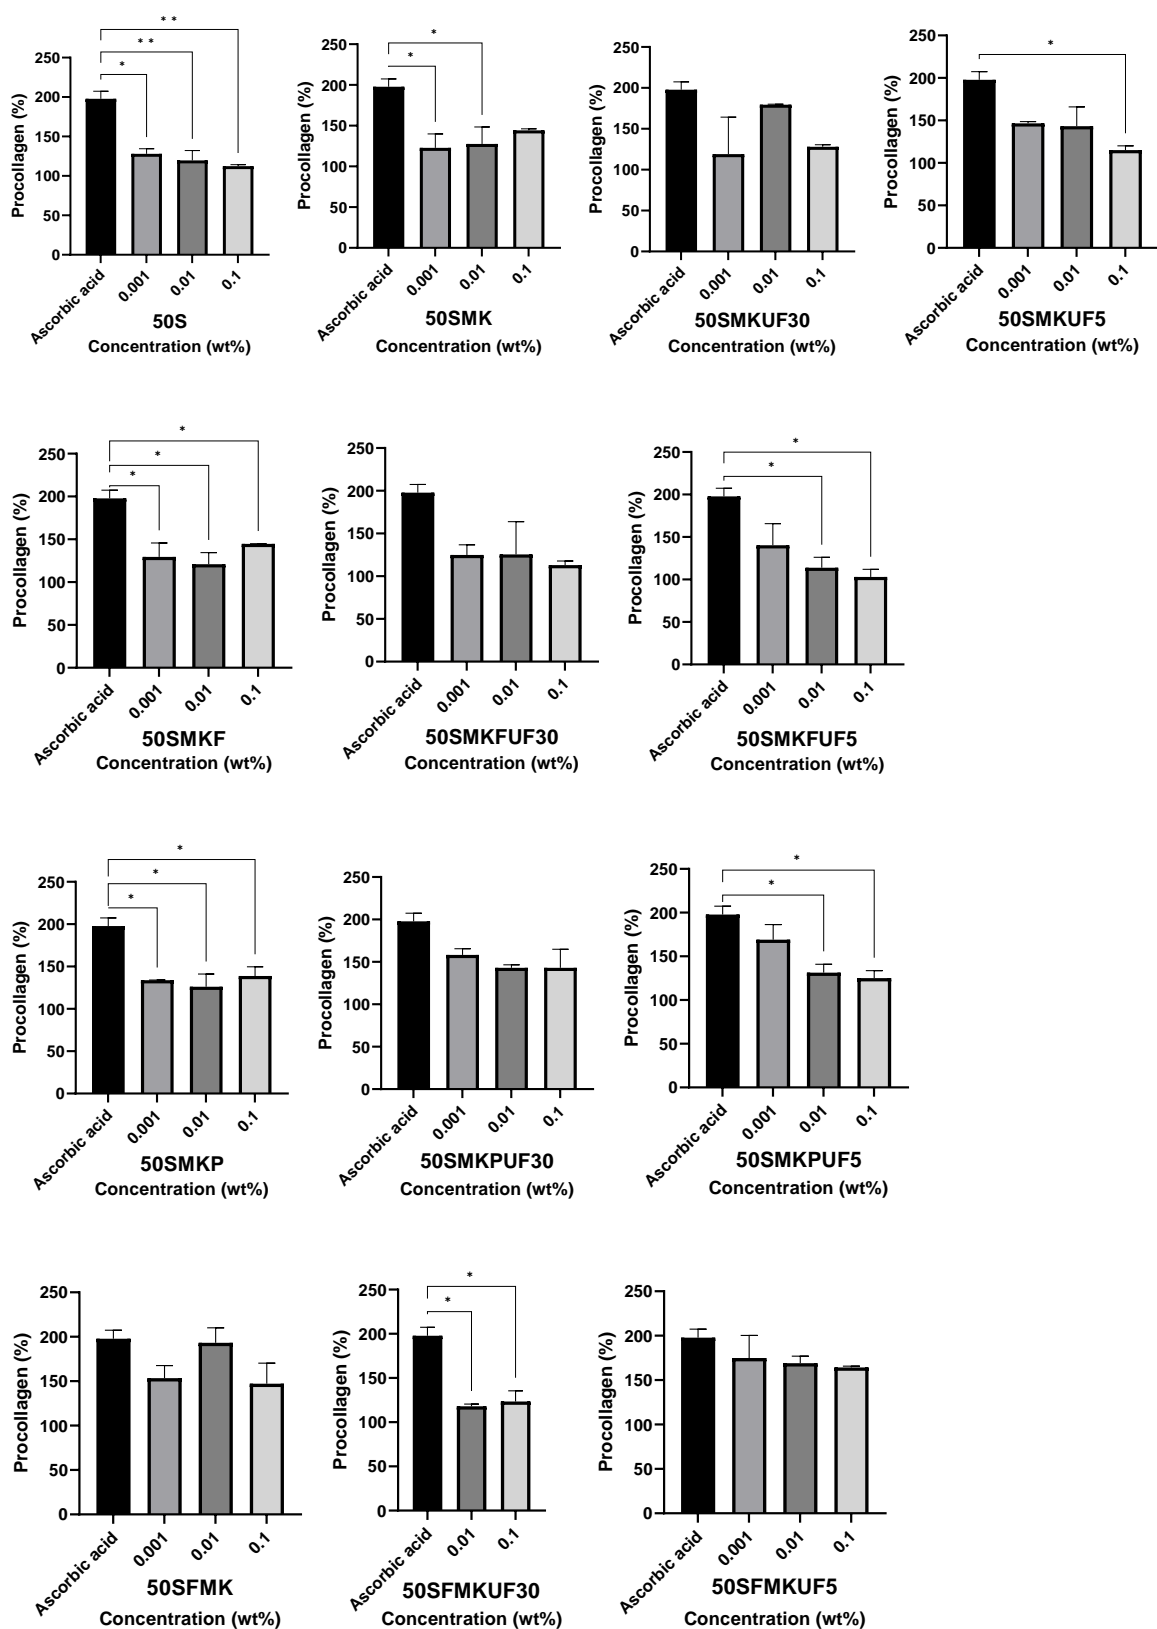

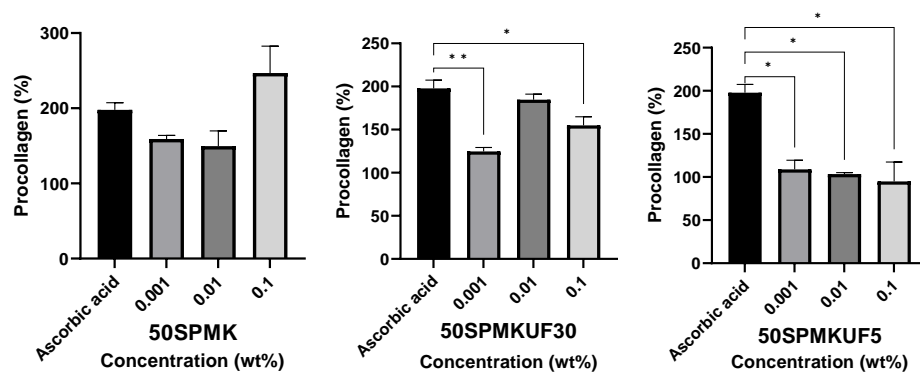

**Figure S4.** Production of type-1-procollagen in UVB-irradiated human dermal fibroblasts treated with soymilk fractions. The mean  $\pm$  SD values of the results were analyzed using two-way ANOVA and Dunnet's test (\* $p$ <0.05, \*\* $p$ <0.01).

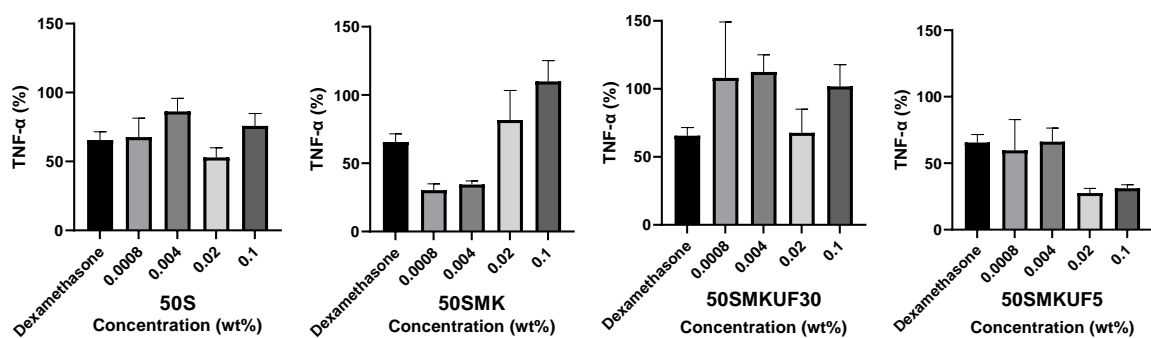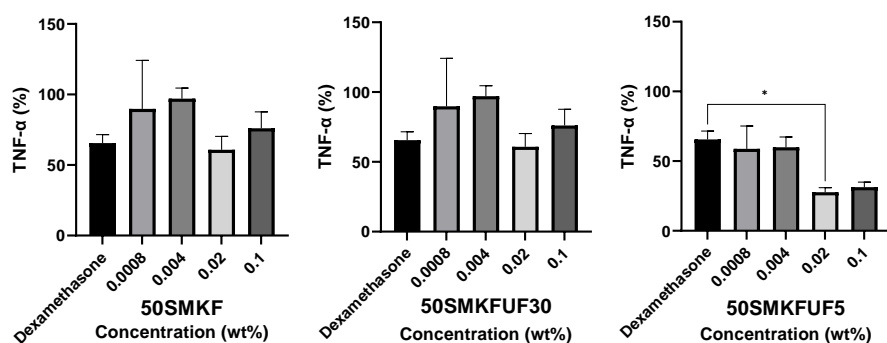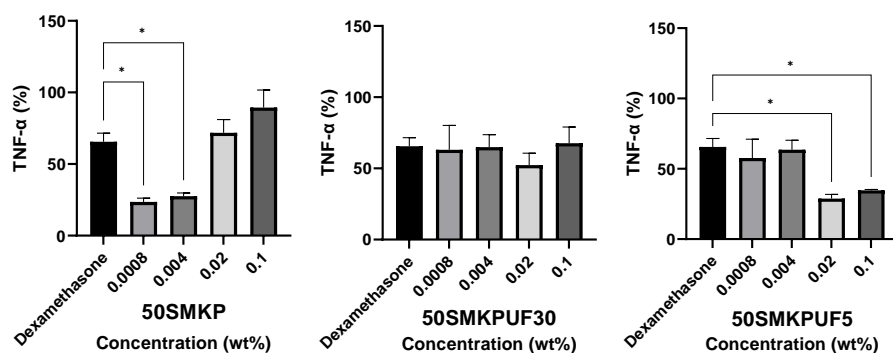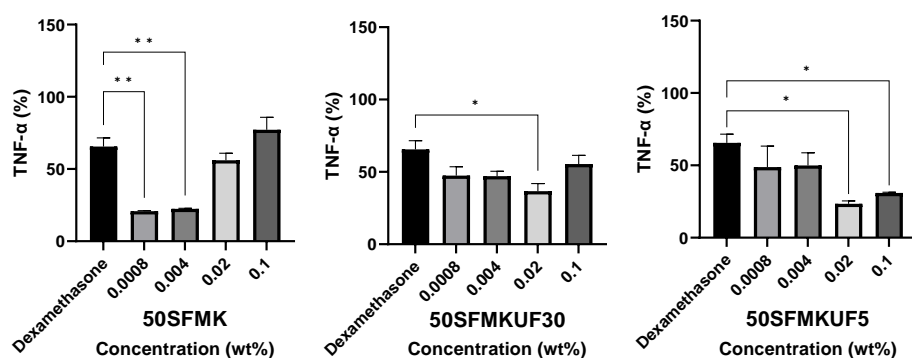



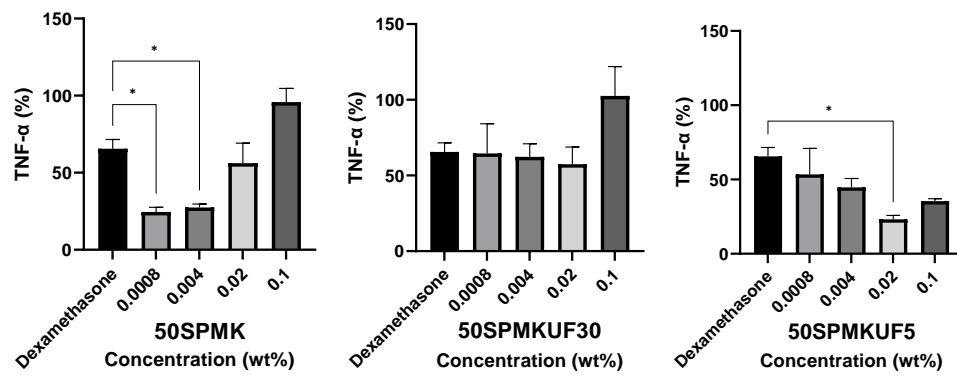

**Figure S5.** Inhibition of TNF- $\alpha$  in UVB-irradiated HaCaT keratinocytes treated with soymilk fractions. The mean  $\pm$  SD values of the results were analyzed using two-way ANOVA and Dunnet's test (\* $p$ <0.05, \*\* $p$ <0.01).

MAKLVLSLCF LLFSGCFALR EQAQQNECQI QKLNALKPDN RIESEGGFIE TWNPNNKPFQ CAGVALSRCT  
LNRNALRRPS YTNGPQEIYI QQGNGIFGMI FPGCPSTYQE PQESQQRGRS QRPQDRHQKV HRFREGDLIA  
VPTGVAWWMY NNEDTPVVAV SIIDTNSLEN QLDQMPRRFY LAGNQEQEFL KYQQQQQGGG  
QSQKGKQEE ENEGSNILSG FAPEFLKEAF GVNMQIVRNL QGENEEEDSG AIVTVKGGLR VTAPAMRKPQ  
QEEDDDDEEE QPQCVETDKG CQRQSKRSRN GIDETICTMR LRQNIQNSS PDIYNPQAGS ITTATSLDFP  
ALWLLKLSAQ YGSLRKNAME VPHYTLNANS IYALNGRAL VQVVNCNGER VFDGELQEGG VLIVPQNFAV  
AAKSQSDNFE YVSFKTND RP SIGNLAGANS LLNALPEEVI QHTFNLKSQQ ARQVKNNNPF SFLVPPQESQ  
RAVA

**Figure S6.** Amino acid sequence of glycinin G2 (NCBI NP\_001235810.1).

MGKPFTLSLS SLCLLLSSA CFAISSSKLN ECQLNNLNAL EPDHRVESEG GLIQTWNSQH  
PELKCAGVTV SKLTNLRNGL HLPSSPYPR MIIAQGKGA LGVAIPGCPE TFEPPQEASN  
RRGSRSQKQQ LQDSHQKIRH FNEGDVLVIP PGVPYWTYNT GDEPVVAISL LDTSNFNQNL  
DQTPRVFYLA GNPDIETPET MQQQQQQKSH GGRKQGQHQQ EEEEEGGSVL SGFSKHFLAQ  
SFNTNEDIAE KLQSPDDERK QIVTEGGLS VISPKWQEQQ DEDEDEDEDD EDEQIPSHPP  
RRPSHGKREQ DEDEDEDEDK PRPSRPSQ GK REQDQDQDED EDEDEDQPRK SREWRSKKTQ  
PRRPRQEEPR ERGCETRNGV EENICTLKLH ENIARPSRAD FYNPKAGRIS TLNSLTLPAL  
RQFQLSAQYV VLYKNGIYSP HWNLNANSVI YVTRGQGKVR VVNCQGNVAV DGELRRGQLL  
VVPQNFVVAE QAGEQGFEYI VFKTHHNAV T SYLKDVFR AI PSEVLAHSYN LRQSQVSELK  
YEGNWGPLVN PESQQGSPRV KVA

**Figure S7.** Amino acid sequence of glycinin G4 (NCBI NP\_001238008.1).

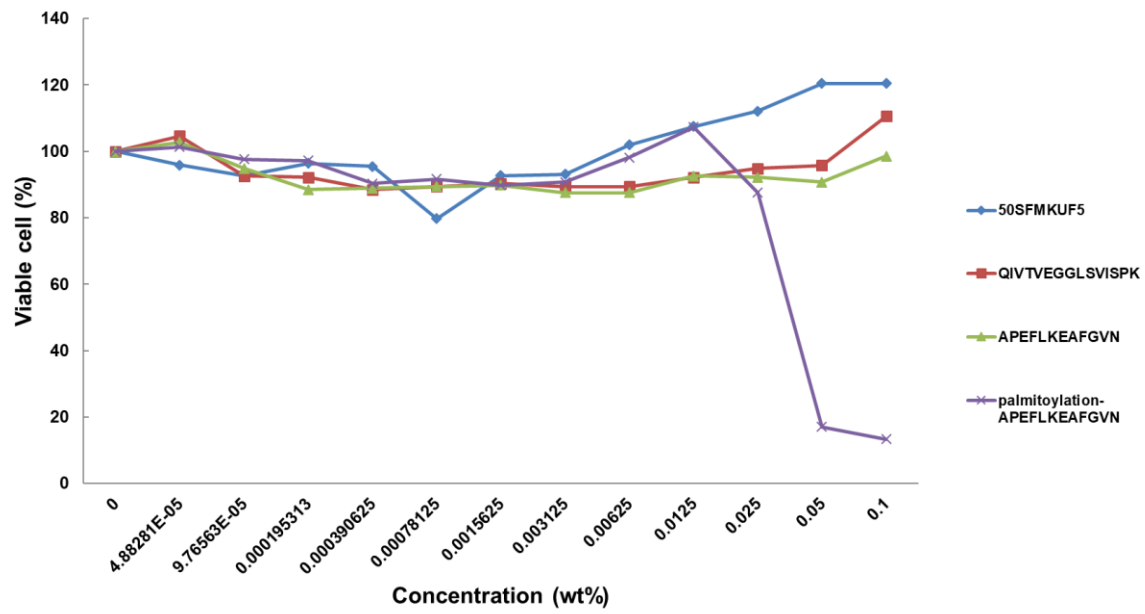

Figure S8. Effect of peptides on the viability of human dermal fibroblasts.

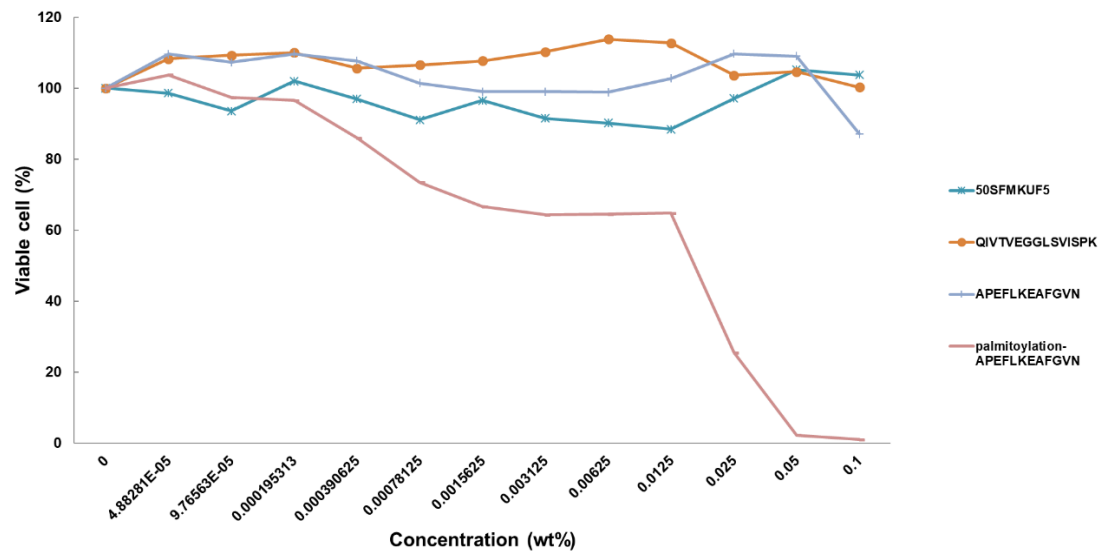

**Figure S9.** Effect of peptides on the cytotoxicity of HaCaT keratinocytes.

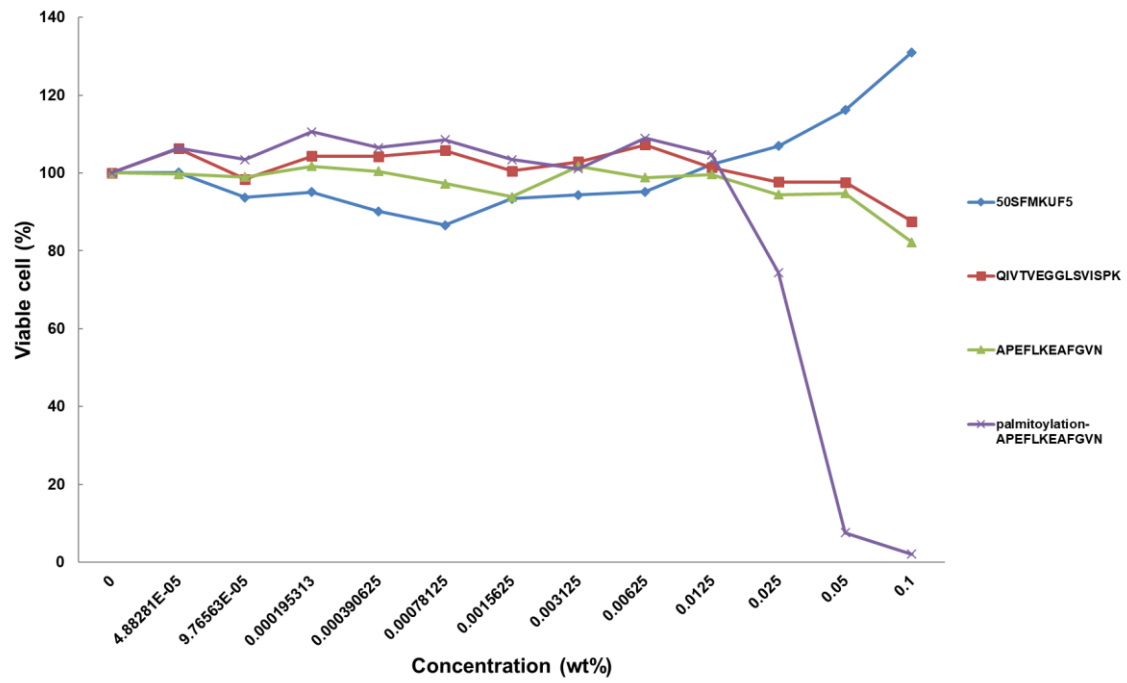

Figure S10. Effect of peptides on the cytotoxicity of B16F1 melanoma.
